# Supplementary material
Source: PubMed Central journal article supplement (PMC4260576)
Supplement: pnas.201407457SI.pdf [file pnas.201407457SI.pdf]

# Supporting Information

Iversen et al. 10.1073/pnas.1407457111

## SI Materials and Methods

**Mass Spectrometry.** Samples were run by using a Waters HDX-Manager with a desalting flow provided by an Agilent 1260 Infinity quaternary pump and a gradient flow provided by a nanoAcquity UPLC Binary Solvent Manager (Waters). For measurements on intact proteins (global-exchange analysis), a 50  $\mu\text{L}/\text{min}$  gradient flow [5% (vol/vol) B to 50% B over 3 min] was used, along with a MassPREP Micro Desalting Column (Waters) for desalting. For measurements on peptides (local-exchange analysis), a 40  $\mu\text{L}/\text{min}$  gradient flow (5% B to 50% B over 12 min) was used, along with ACQUITY UPLC BEH C18, 1.7  $\mu\text{m}$ , 2.1 mm  $\times$  50 mm VanGuard Pre-Columns and 1.0 mm  $\times$  100 mm analytical columns for desalting and peptide separation, respectively. A column containing immobilized pepsin was placed

between the loop and the desalting trap to digest the samples. Samples were subjected to electrospray ionization-MS by using a Waters Synapt G1 mass spectrometer with detector MCP voltage of 1,700 V for intact proteins or 1,950 V for peptides. Rigorous washing steps were performed between each injection.

**Data Analysis.** Mass spectra of intact TG2 were deconvoluted by using MaxEnt 1 in MassLynx v4.1. Peptides from peptic digests were identified from data-dependent acquisition MS/MS runs by using ProteinLynx Global Server v2.4 (Waters) and MassAI v1.05 (MassAI Bioinformatics, [www.massai.dk](http://www.massai.dk)). Deuterium incorporation for intact proteins and peptides was quantified by using DynamX v1.0 (Waters). Visualizations (PDB ID codes 2Q3Z and 1KV3) were created by using VMD v1.9.1 (1).

1. Humphrey W, Dalke A, Schulten K (1996) VMD: Visual molecular dynamics. *J Mol Graph* 14(1):33–38, 27–38.

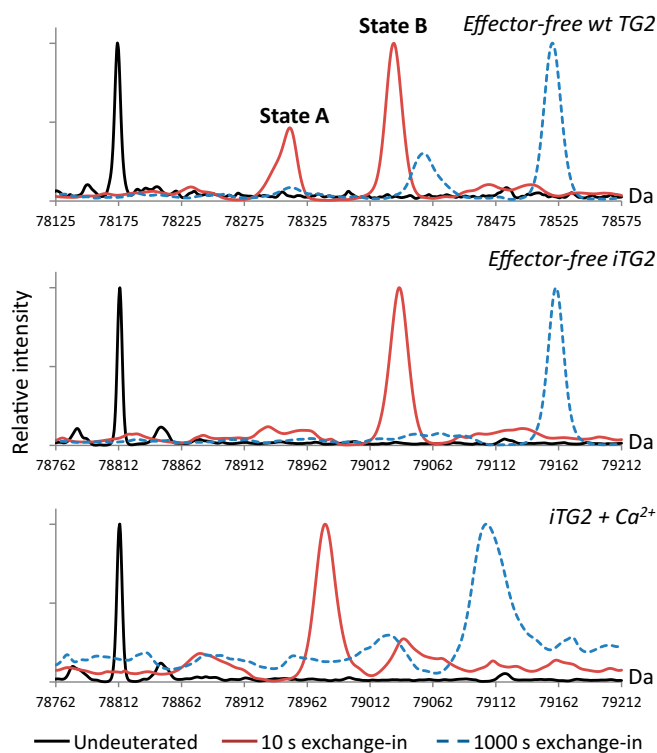

**Fig. S1.** Deconvoluted global-exchange spectra for effector-free WT TG2, effector-free iTG2, and iTG2 labeled in the presence of 5 mM  $\text{CaCl}_2$ . In the absence of  $\text{Ca}^{2+}$ , iTG2 and the open conformation, state B, in WT TG2 were found to exhibit similar behavior during isotopic exchange, indicating that the inhibitor had a minimal impact on the dynamics of the open conformation. The inhibitor did appear, however, to prevent the formation of closed conformation, state A. Adding  $\text{Ca}^{2+}$  to the solution before labeling had a pronounced stabilizing effect on iTG2.

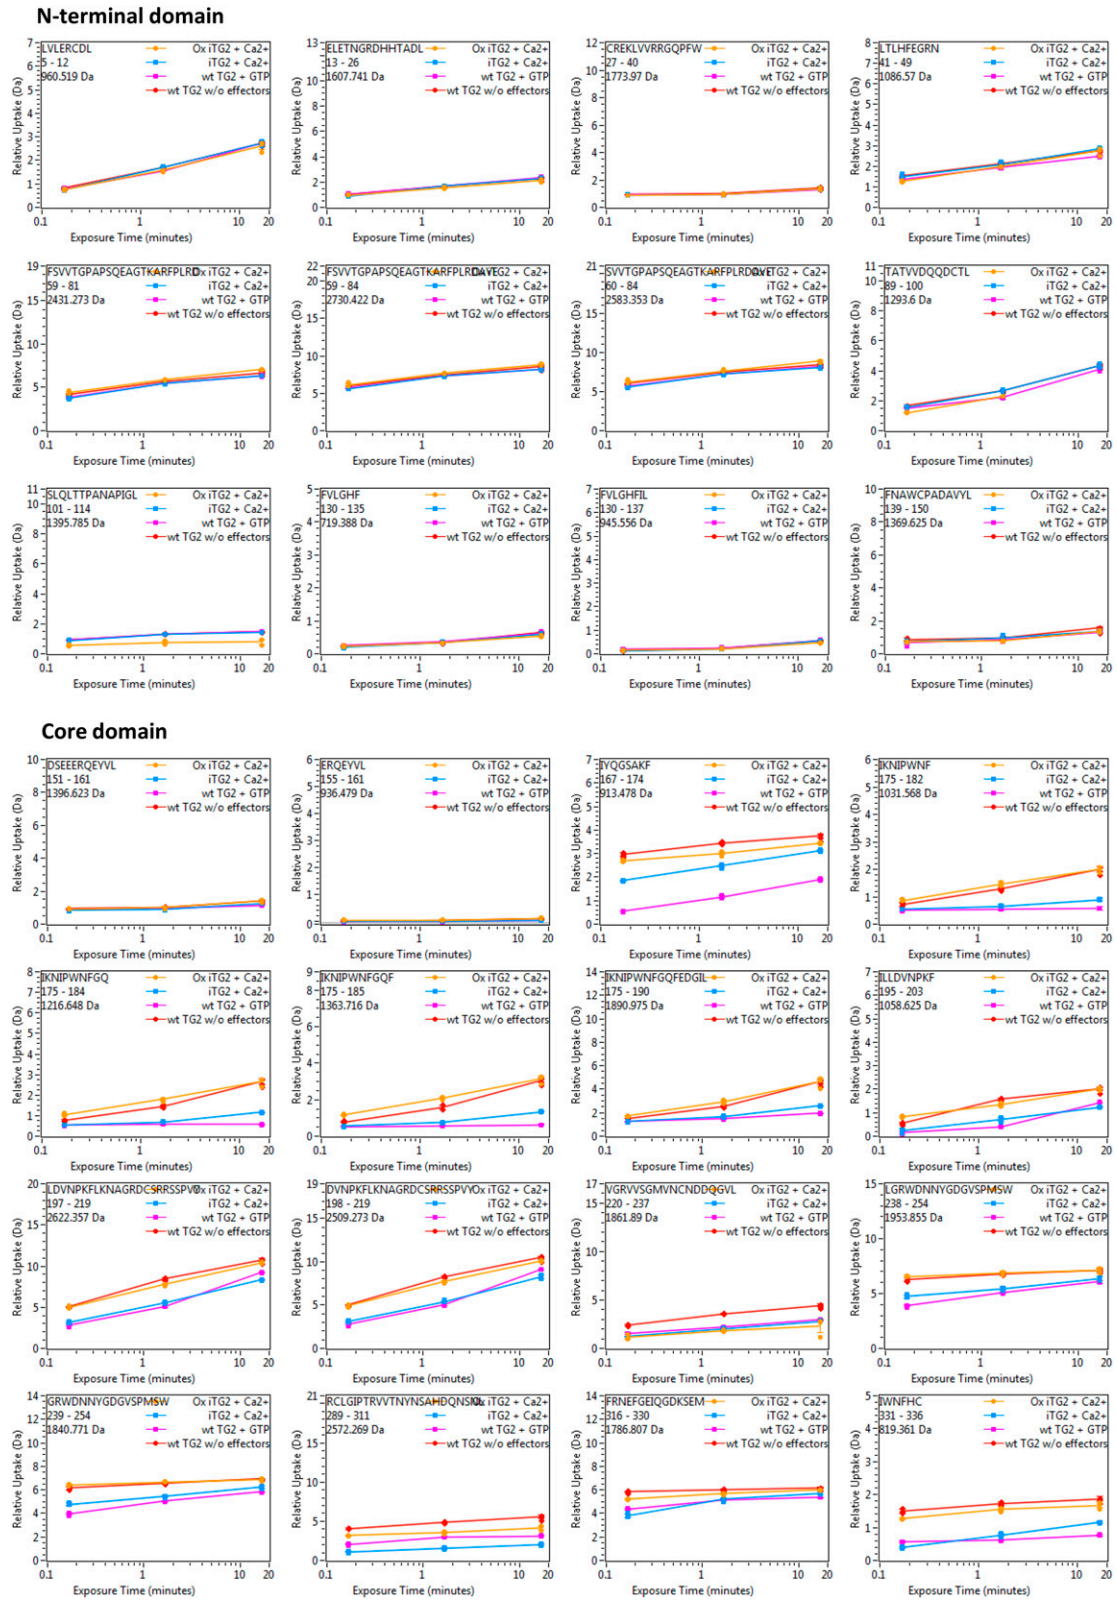

Fig. S2. (Continued)











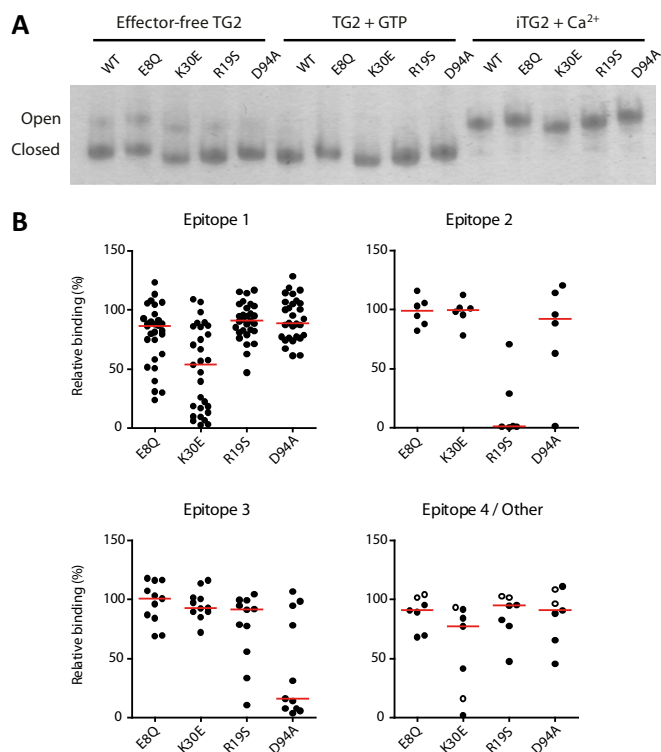

**Fig. S7.** Effect of TG2 mutations on protein conformation and binding to mAbs in the presence of Ca<sup>2+</sup>. (A) Nondenaturing PAGE analysis of WT and mutant TG2 that had either been left untreated or incubated with GTP or a combination of Ca<sup>2+</sup> and the active-site inhibitor Ac-P(DON)LPF-NH<sub>2</sub>. WT and mutants display the same distributions between open and closed conformations. (B) Reactivity of 53 TG2-specific mAbs to mutant iTG2 in the presence of Ca<sup>2+</sup> as determined by ELISA. Signals obtained with the indicated mutants are given relative to the signals obtained with WT iTG2. Red bars indicate medians. Compared with the results reported in Fig. 4, the mutations have lower impact on the binding of several mAbs when Ca<sup>2+</sup> is present.

**Table S1. Deuterium uptake in different TG2 states**

| Exchange time, s | State A       | State B       | TG2 + GTP     | iTG2 + Ca <sup>2+</sup> |
|------------------|---------------|---------------|---------------|-------------------------|
| 10               | 118.6 (± 2.6) | 189.4 (± 1.1) | 116.8 (± 2.1) | 142.0 (± 0.7)           |
| 100              | 161.6 (± 3.0) | 240.6 (± 1.6) | 157.1 (± 0.3) | 191.5 (± 1.3)           |
| 1,000            | 204.9 (± 5.9) | 293.1 (± 2.5) | 197.1 (± 0.9) | 236.3 (± 3.6)           |

Values represent the mass increase in daltons ± SD based on analytical duplicates of a single labeling.



**Table S2. List of detected TG2 peptides and labeling characteristics**

| Peptide list              |     |                            | Effector binding*     |                     |                    | Effect of oxidation*       |                                                             |                                       |
|---------------------------|-----|----------------------------|-----------------------|---------------------|--------------------|----------------------------|-------------------------------------------------------------|---------------------------------------|
| Start                     | End | Sequence                   | Protected when closed | Protected when open | All states similar | More dynamic when oxidized | Eff-free similar to Ox but not Red iTG2 w. Ca <sup>2+</sup> | Effects upon mAb binding <sup>†</sup> |
| <b>N-terminal domain</b>  |     |                            |                       |                     |                    |                            |                                                             |                                       |
| 5                         | 12  | LVLERC DL                  |                       |                     | X                  |                            |                                                             | X                                     |
| 13                        | 26  | ELETNGRDHHTADL             |                       |                     | X                  |                            |                                                             | X                                     |
| 27                        | 40  | CREKLVVRRGQPFW             |                       |                     | X                  |                            |                                                             | X                                     |
| 41                        | 49  | LTLHFEGRN                  |                       |                     | X                  |                            |                                                             |                                       |
| 59                        | 81  | FSVVTGPAPSQEAGTKARFPLRD    |                       |                     | X                  |                            |                                                             | X                                     |
| 59                        | 84  | FSVVTGPAPSQEAGTKARFPLRDAVE |                       |                     | X                  |                            |                                                             | X                                     |
| 60                        | 84  | SVVTGPAPSQEAGTKARFPLRDAVE  |                       |                     | X                  |                            |                                                             | X                                     |
| 89                        | 100 | TATVVDQQDCTL               |                       |                     | X                  |                            |                                                             | X                                     |
| 101                       | 114 | SLQLTTPANAPIGL             |                       |                     | X                  |                            |                                                             |                                       |
| 130                       | 135 | FVLGHF                     |                       |                     | X                  |                            |                                                             | X                                     |
| 130                       | 137 | FVLGHFIL                   |                       |                     | X                  |                            |                                                             | X                                     |
| 139                       | 150 | FNAWCPADAVYL               |                       |                     | X                  |                            |                                                             |                                       |
| <b>Core domain</b>        |     |                            |                       |                     |                    |                            |                                                             |                                       |
| 151                       | 161 | DSEERQEYVL                 |                       |                     | X                  |                            |                                                             | X                                     |
| 155                       | 161 | ERQEYVL                    |                       |                     | X                  |                            |                                                             |                                       |
| 167                       | 174 | IYQGS AKF                  | X                     |                     |                    | X                          | X                                                           | X                                     |
| 175                       | 182 | IKNIPWNF                   | X                     |                     |                    | X                          | X                                                           |                                       |
| 175                       | 184 | IKNIPWNFGQ                 | X                     |                     |                    | X                          | X                                                           |                                       |
| 175                       | 185 | IKNIPWNFGQF                | X                     |                     |                    | X                          | X                                                           | X                                     |
| 175                       | 190 | IKNIPWNFGQFEDGIL           | X                     |                     |                    | X                          | X                                                           |                                       |
| 195                       | 203 | ILLDVNPKF                  |                       |                     |                    | X                          | X                                                           |                                       |
| 197                       | 219 | LDVNP KFLKNAGRDCSRRSSPVY   |                       |                     |                    | X                          | X                                                           | X                                     |
| 198                       | 219 | DVNP KFLKNAGRDCSRRSSPVY    |                       |                     |                    | X                          | X                                                           | X                                     |
| 220                       | 237 | VGRVVS GMVNCNDDQGV L       |                       |                     |                    |                            |                                                             |                                       |
| 238                       | 254 | LGRWDNNYGDGVSPMSW          | X                     |                     |                    | X                          | X                                                           |                                       |
| 239                       | 254 | GRWDNNYGDGVSPMSW           | X                     |                     |                    | X                          | X                                                           | X                                     |
| 289                       | 311 | RCLGIPTRVVTNYNSAHDQNSNL    |                       | X                   |                    | X                          |                                                             | X                                     |
| 316                       | 330 | FRNEFG EI QGDKSEM          |                       |                     |                    | X                          | X                                                           |                                       |
| 331                       | 336 | IWNFHC                     | X                     |                     |                    | X                          | X                                                           | X                                     |
| 342                       | 353 | MTRPDLQPGYEG               |                       |                     |                    | X                          | X                                                           |                                       |
| 342                       | 354 | MTRPDLQPGYEGW              |                       |                     |                    | X                          | X                                                           |                                       |
| 354                       | 369 | WQALDPTPQEKSEGTY           |                       | X                   |                    | Ox data NA <sup>‡</sup>    | Ox data NA <sup>‡</sup>                                     | X                                     |
| 355                       | 369 | QALDPTPQEKSEGTY            |                       | X                   |                    | Ox data NA <sup>‡</sup>    | Ox data NA <sup>‡</sup>                                     |                                       |
| 370                       | 378 | CCGPV PVRA                 |                       |                     |                    | Ox data NA <sup>‡</sup>    | Ox data NA <sup>‡</sup>                                     |                                       |
| 379                       | 394 | IKEGDLSTKYDAPFVF           |                       |                     |                    | X                          |                                                             | X                                     |
| 385                       | 394 | STKYDAPFVF                 |                       |                     |                    | X                          |                                                             | X                                     |
| 404                       | 419 | WIQQDDGSVHKSINRS           | X                     |                     |                    |                            |                                                             |                                       |
| 404                       | 423 | WIQQDDGSVHKSINRSLIVG       | X                     |                     |                    |                            |                                                             | X                                     |
| 424                       | 434 | LKISTKSVGRD                | X                     |                     |                    | X                          |                                                             | X                                     |
| 424                       | 442 | LKISTKSVGRDEREDITH T       |                       |                     |                    | X                          |                                                             |                                       |
| <b>C-terminal domains</b> |     |                            |                       |                     |                    |                            |                                                             |                                       |
| 463                       | 474 | NKLAEKEETGMA               |                       |                     | X                  |                            |                                                             |                                       |
| 511                       | 532 | ARTVSYNGILGPECGTKYLLNL     | X                     |                     |                    | Ox data NA <sup>‡</sup>    | Ox data NA <sup>‡</sup>                                     | X                                     |
| 517                       | 532 | NGILGPECGTKYLLNL           | X                     |                     |                    | Ox data NA <sup>‡</sup>    | Ox data NA <sup>‡</sup>                                     | X                                     |
| 533                       | 546 | NLEPFSEKSVPLCI             | X                     |                     |                    |                            |                                                             | X                                     |
| 548                       | 555 | YEKYRDCL                   | X                     |                     |                    | Ox data NA <sup>‡</sup>    | Ox data NA <sup>‡</sup>                                     |                                       |
| 561                       | 567 | IKVRALL                    | X                     |                     |                    |                            |                                                             |                                       |
| 561                       | 569 | IKVRALLVE                  | X                     |                     |                    |                            |                                                             |                                       |
| 584                       | 606 | LENPEIKIRILGEPKQKRKLVAE    | X                     |                     |                    |                            |                                                             | X                                     |
| 587                       | 606 | PEIKIRILGEPKQKRKLVAE       | X                     |                     |                    |                            |                                                             | X                                     |
| 591                       | 606 | IRILGEPKQKRKLVAE           | X                     |                     |                    |                            |                                                             |                                       |
| 607                       | 617 | VSLQNPLPVAL                | X                     |                     |                    |                            |                                                             |                                       |
| 630                       | 643 | TEEQKTVEIPDPVE             | X                     |                     |                    |                            |                                                             |                                       |
| 647                       | 661 | EVKVRMDLLPLHMGL            | X                     |                     |                    |                            |                                                             |                                       |
| 648                       | 661 | VKVRMDLLPLHMGL             | X                     |                     |                    |                            |                                                             |                                       |
| 653                       | 668 | DLLPLHMGLHKLVVNF           | X                     |                     |                    |                            |                                                             |                                       |
| 662                       | 668 | HKLVVNF                    | X                     |                     |                    |                            |                                                             | X                                     |

\*Color coding matches the one used in Fig. 2 on the open and closed structures of TG2. Deuterium uptake plots, which the identifications are based on, are shown in Fig. S2.

<sup>†</sup>For the indicated peptides, deuterium uptake was found to be significantly different upon mAb binding, based on unpaired two-tailed t tests ( $P < 0.05$ ). The relevant deuterium uptake plots are shown in Fig. S4.

<sup>‡</sup>Peptides could not be observed in the oxidized samples. Cysteine residues present in these peptides or at the pepsin cleavage site have presumably formed disulfide bonds.
